# Supplementary material for: Interaction effects of multimorbidity and frailty on adverse health outcomes in elderly hospitalised patients
Source: PubMed Central journal article supplement (PMC9391344; doi:10.1038/s41598-022-18346-x), 2022-08-19
Supplement: 41598_2022_18346_MOESM1_ESM.pdf [file 41598_2022_18346_MOESM1_ESM.pdf]

## **Supplementary Tables**

Table S1. Baseline characteristics by multimorbidity and frailty at index hospital stay (2010 – 2012)

Table S2. Additive and multiplicative Interaction effects of multimorbidity and frailty risk on adverse patient outcomes, surgical cohort

Table S3. Additive and multiplicative Interaction effects of multimorbidity and frailty risk on adverse patient outcomes, medical cohort

Table S4. List of ICD-10 codes for morbidity ascertainment

Table S5. List of ICD-10 codes for HFERS calculation

**Supplementary Table S1.** Baseline characteristics by multimorbidity and frailty at index hospital stay (2010 – 2012)

|                                                            | Total          | Frailty risk category |                    |                    | Multimorbidity  |                    |                    |                 |
|------------------------------------------------------------|----------------|-----------------------|--------------------|--------------------|-----------------|--------------------|--------------------|-----------------|
|                                                            |                | <i>N</i> = 257,535    | Low risk           | Elevated risk      | <i>p</i> -value | No                 | Yes                | <i>p</i> -value |
|                                                            |                |                       | <i>n</i> = 119,737 | <i>n</i> = 137,798 |                 | <i>n</i> = 133,067 | <i>n</i> = 124,468 |                 |
| <b>Sex, n (%)</b>                                          |                |                       |                    |                    |                 |                    |                    |                 |
| Male                                                       | 110,125 (42.8) | 53,950 (45.1)         | 56,175 (40.8)      | <0.01              | 51,497 (38.7)   | 58,628 (47.1)      | <0.01              |                 |
| Female                                                     | 147,410 (57.2) | 65,787 (54.9)         | 81,623 (59.2)      |                    | 81,570 (61.3)   | 65,840 (52.9)      |                    |                 |
| <b>Median age [IQR]</b>                                    |                |                       |                    |                    |                 |                    |                    |                 |
|                                                            | 83.3           | 81.9                  | 84.6               | <0.01              | 83.0            | 83.6               | <0.01              |                 |
|                                                            | [79.2 – 87.7]  | [78.3 – 86.2]         | [80.3 – 88.8]      |                    | [79.0 – 87.5]   | [79.5 – 87.9]      |                    |                 |
| <b>Age, n (%)</b>                                          |                |                       |                    |                    |                 |                    |                    |                 |
| 75-79                                                      | 76,233 (29.6)  | 43,885 (36.7)         | 32,348 (23.5)      | <0.01              | 41,512 (31.2)   | 34,721 (27.9)      | <0.01              |                 |
| 80-84                                                      | 78,766 (30.6)  | 38,690 (32.3)         | 40,076 (29.1)      |                    | 40,731 (30.6)   | 38,035 (30.6)      |                    |                 |
| 85-89                                                      | 63,894 (24.8)  | 24,922 (20.8)         | 38,972 (28.3)      |                    | 31,183 (23.4)   | 32,711 (26.3)      |                    |                 |
| 90+                                                        | 38,642 (15)    | 12,240 (10.2)         | 26,402 (19.2)      |                    | 19,641 (14.8)   | 19,001 (15.3)      |                    |                 |
| <b>Aboriginal and Torres Strait Islander status, n (%)</b> |                |                       |                    |                    |                 |                    |                    |                 |
| Non-Aboriginal                                             | 256,100 (99.4) | 119,029 (99.4)        | 137,071 (99.5)     | 0.03               | 132,406 (99.5)  | 123,694 (99.4)     | <0.01              |                 |
| Aboriginal                                                 | 1,435 (0.6)    | 708 (0.6)             | 727 (0.5)          |                    | 661 (0.5)       | 774 (0.6)          |                    |                 |
| <b>Socioeconomic status quartiles, n(%)</b>                |                |                       |                    |                    |                 |                    |                    |                 |
| Most disadvantaged                                         | 66,279 (25.7)  | 32,486 (27.1)         | 33,793 (24.5)      | <0.01              | 34,104 (25.6)   | 32,175 (25.9)      | <0.01              |                 |
| 2                                                          | 54,192 (21)    | 26,133 (21.8)         | 28,059 (20.4)      |                    | 28,487 (21.4)   | 25,705 (20.7)      |                    |                 |
| 3                                                          | 46,441 (18)    | 21,637 (18.1)         | 24,804 (18)        |                    | 24,421 (18.4)   | 22,020 (17.7)      |                    |                 |
| 4                                                          | 47,350 (18.4)  | 21,112 (17.6)         | 26,238 (19)        |                    | 24,380 (18.3)   | 22,970 (18.5)      |                    |                 |
| Most advantaged                                            | 40,911 (15.9)  | 17,585 (14.7)         | 23,326 (16.9)      |                    | 20,591 (15.5)   | 20,320 (16.3)      |                    |                 |
| Missing                                                    | 2,362 (0.9)    | 784 (0.7)             | 1,578 (1.1)        |                    | 1,084 (0.8)     | 1,278 (1)          |                    |                 |
| <b>Admission type, n (%)</b>                               |                |                       |                    |                    |                 |                    |                    |                 |
| Medical                                                    | 224,949 (87.3) | 104,200 (87)          | 120,749 (87.6)     | <0.01              | 116,611 (87.6)  | 108,338 (87)       | <0.01              |                 |
| Surgical                                                   | 23,339 (9.1)   | 10,030 (8.4)          | 13,309 (9.7)       |                    | 12,394 (9.3)    | 10,945 (8.8)       |                    |                 |
| Other                                                      | 9,247 (3.6)    | 5,507 (4.6)           | 3,740 (2.7)        |                    | 4,062 (3.1)     | 5,185 (4.2)        |                    |                 |

| <b>Number of prior admissions over 2 years, excluding index admission, n (%)</b> |                |               |               |       |               |               |       |
|----------------------------------------------------------------------------------|----------------|---------------|---------------|-------|---------------|---------------|-------|
| 0                                                                                | 84,775 (32.9)  | 54,543 (45.6) | 30,232 (21.9) | <0.01 | 60,599 (45.5) | 24,176 (19.4) | <0.01 |
| 1                                                                                | 62,827 (24.4)  | 30,525 (25.5) | 32,302 (23.4) |       | 34,803 (26.2) | 28,024 (22.5) |       |
| 2 or more                                                                        | 109,933 (42.7) | 34,669 (29)   | 75,264 (54.6) |       | 37,665 (28.3) | 72,268 (58.1) |       |
| <b>HFRS category</b>                                                             |                |               |               |       |               |               |       |
| Low risk                                                                         | 119,737 (46.5) | 119,737 (100) |               |       | 81,788 (61.5) | 37,949 (30.5) | <0.01 |
| Elevated risk                                                                    | 137,798 (53.5) |               | 137,798 (100) |       | 51,279 (38.5) | 86,519 (69.5) |       |
| <b>Multimorbidity</b>                                                            |                |               |               |       |               |               |       |
| No                                                                               | 133,067 (51.7) | 81,788 (68.3) | 51,279 (37.2) | <0.01 | 133,067 (100) |               |       |
| Yes                                                                              | 124,468 (48.3) | 37,949 (31.7) | 86,519 (62.8) |       |               | 124,486 (100) |       |
| <b>Median HFRS [IQR]</b>                                                         |                |               |               |       |               |               |       |
|                                                                                  | 5.5            | 1.8           | 11.3          | <0.01 | 3.4           | 9.1           | <0.01 |
|                                                                                  | [1.9 – 12.0]   | [0 – 3.2]     | [7.6 – 17.6]  |       | [1.1 – 7.5]   | [3.9 – 16.7]  |       |
| <b>Median number of chronic conditions [IQR]</b>                                 |                |               |               |       |               |               |       |
|                                                                                  | 1              | 1             | 2             | <0.01 | 0             | 3             | <0.01 |
|                                                                                  | [0 – 3]        | [0 – 2]       | [1 – 4]       |       | [0 – 1]       | [2 – 4]       |       |

HFRS – Hospital frailty risk score, IQR – interquartile range

**Supplementary Table S2.** Additive and multiplicative Interaction effects of multimorbidity and frailty risk on adverse patient outcomes, surgical cohort

| <b>Mortality within 30-days post discharge</b>                                                                  | <b>Non-frail</b> |           |                    | <b>Frail</b>   |           |                    |
|-----------------------------------------------------------------------------------------------------------------|------------------|-----------|--------------------|----------------|-----------|--------------------|
|                                                                                                                 | N with outcome   | % outcome | aRR (95% CI)       | N with outcome | % outcome | aRR (95% CI)       |
| <b>No multimorbidity</b>                                                                                        | 171              | 2.4       | 1                  | 379            | 7.1       | 2.75 (2.29 – 3.31) |
| <b>Multimorbidity</b>                                                                                           | 229              | 7.6       | 3.21 (2.63 – 3.93) | 1,339          | 16.9      | 7.24 (6.14 – 8.54) |
| <i>Measure of effect modification on additive scale: RERI (95% CI) = 2.27 (1.58 – 2.96) *</i>                   |                  |           |                    |                |           |                    |
| <i>Measure of effect modification on multiplicative scale: ratio of RR= 0.82 (0.65 – 1.03), p-value =0.086</i>  |                  |           |                    |                |           |                    |
| <b>Prolonged LOS</b>                                                                                            | <b>Non-frail</b> |           |                    | <b>Frail</b>   |           |                    |
|                                                                                                                 | N with outcome   | % outcome | aRR (95% CI)       | N with outcome | % outcome | aRR (95% CI)       |
| <b>No multimorbidity</b>                                                                                        | 2,735            | 39.0      | 1                  | 3,921          | 73.0      | 1.76 (1.67 – 1.85) |
| <b>Multimorbidity</b>                                                                                           | 1,239            | 41.2      | 1.05 (0.98 – 1.12) | 6,088          | 76.7      | 1.91 (1.82 – 2.00) |
| <i>Measure of effect modification on additive scale: RERI (95% CI) =0.10 (0.00 – 0.20)*</i>                     |                  |           |                    |                |           |                    |
| <i>Measure of effect modification on multiplicative scale: ratio of RR=1.03 (0.96 – 1.12) , p-value =0.391</i>  |                  |           |                    |                |           |                    |
| <b>Readmission within 30-days post discharge</b>                                                                | <b>Non-frail</b> |           |                    | <b>Frail</b>   |           |                    |
|                                                                                                                 | N with outcome   | % outcome | aRR (95% CI)       | N with outcome | % outcome | aRR (95% CI)       |
| <b>No multimorbidity</b>                                                                                        | 281              | 4.1       | 1                  | 356            | 7.0       | 1.64 (1.40 – 1.92) |
| <b>Multimorbidity</b>                                                                                           | 263              | 9.4       | 1.99 (1.68 – 2.36) | 863            | 13.2      | 2.63 (2.28 – 3.03) |
| <i>Measure of effect modification on additive scale: RERI (95% CI) =0.01 (-0.36 – 0.37)</i>                     |                  |           |                    |                |           |                    |
| <i>Measure of effect modification on multiplicative scale: ratio of RR= 0.81 (0.66 – 1.00), p-value =0.046*</i> |                  |           |                    |                |           |                    |

\* Significant at 5% level. <sup>a</sup> Significance of an interaction on an additive scale is denoted where RERI is different from 0, and on the multiplicative scale if ratio of RR is different from 1.

**Supplementary Table S3.** Additive and multiplicative Interaction effects of multimorbidity and frailty risk on adverse patient outcomes, medical cohort

| Mortality within 30-days post discharge | Non-frail      |           |                    | Frail          |           |                    |
|-----------------------------------------|----------------|-----------|--------------------|----------------|-----------|--------------------|
|                                         | N with outcome | % outcome | aRR (95% CI)       | N with outcome | % outcome | aRR (95% CI)       |
| <b>No multimorbidity</b>                | 3,572          | 5.0       | 1                  | 4,227          | 9.4       | 1.84 (1.76 – 2.92) |
| <b>Multimorbidity</b>                   | 3,596          | 11.1      | 2.35 (2.25 – 2.47) | 14,267         | 18.8      | 4.00 (3.84 – 4.16) |

Measure of effect modification on additive scale: RERI (95% CI) = 0.81 (0.69 – 0.93)\*

Measure of effect modification on multiplicative scale: ratio of RR= 0.92 (0.87 – 0.98), p-value =0.008\*

| Prolonged LOS            | Non-frail      |           |                    | Frail          |           |                    |
|--------------------------|----------------|-----------|--------------------|----------------|-----------|--------------------|
|                          | N with outcome | % outcome | aRR (95% CI)       | N with outcome | % outcome | aRR (95% CI)       |
| <b>No multimorbidity</b> | 6,726          | 9.4       | 1                  | 11,819         | 26.3      | 2.80 (2.73 – 2.88) |
| <b>Multimorbidity</b>    | 4,642          | 14.3      | 1.68 (1.62 – 1.73) | 24,096         | 31.8      | 3.70 (3.61 – 3.80) |

Measure of effect modification on additive scale: RERI (95% CI) =0.23 (0.15 – 0.30)\*

Measure of effect modification on multiplicative scale: ratio of RR= 0.79 (0.76 – 0.82), p-value <0.001\*

| Readmission within 30-days post discharge | Non-frail      |           |                    | Frail          |           |                    |
|-------------------------------------------|----------------|-----------|--------------------|----------------|-----------|--------------------|
|                                           | N with outcome | % outcome | aRR (95% CI)       | N with outcome | % outcome | aRR (95% CI)       |
| <b>No multimorbidity</b>                  | 4,996          | 7.2       | 1                  | 4,272          | 10.2      | 1.23 (1.18 – 1.28) |
| <b>Multimorbidity</b>                     | 3,461          | 11.7      | 1.36 (1.31 – 1.43) | 10,835         | 16.8      | 1.72 (1.66 – 1.79) |

Measure of effect modification on additive scale: RERI (95% CI) =0.13 (0.06 – 0.20)\*

Measure of effect modification on multiplicative scale: ratio of RR=1.03 (0.97 – 1.09), p-value =0.367

\* Significant at 5% level. Significance of an interaction on an additive scale is denoted where RERI is different from 0, and on the multiplicative scale if ratio of RR is different from 1.

**Supplementary Table S4:** List of ICD-10 codes for multimorbidity ascertainment, and prevalence within cohort and by multimorbidity and frailty risk status

| Name                                                            | ICD-10-AM Codes                                                                                                                                                            | Source                                                                                             | Cohort |      | % within group |       |      |      |  |
|-----------------------------------------------------------------|----------------------------------------------------------------------------------------------------------------------------------------------------------------------------|----------------------------------------------------------------------------------------------------|--------|------|----------------|-------|------|------|--|
|                                                                 |                                                                                                                                                                            |                                                                                                    | N      | %    | Neither        | Frail | MM   | Both |  |
|                                                                 |                                                                                                                                                                            |                                                                                                    |        |      |                | only  | only |      |  |
| <b>AIDS/HIV</b>                                                 | B20.x-B22.x, B24.x                                                                                                                                                         | Elixhauser                                                                                         | 23     | 0.0  | <5             | <5    | 26   | 70   |  |
| <b>Alcohol abuse*</b>                                           | F10.x*, E52.x, G62.1, I42.6, K29.2, K70.0, K70.3, K70.9,<br>T51.x, Z50.2*, Z71.4, Z72.1                                                                                    | Elixhauser                                                                                         | 4,028  | 1.6  | 8              | 11    | 13   | 68   |  |
| <b>Asthma and bronchiectasis</b>                                | J45.x, J46.x, J47.x                                                                                                                                                        | New                                                                                                | 5,063  | 2.0  | 14             | 5     | 27   | 54   |  |
| <b>Cancer</b>                                                   | C00.x -C26.x, C30.x -C34.x, C37.x -C41.x, C43.x, C45.x -<br>C58.x, C60.x -C76.x, C77.x -C80.x, C81.x-C85.x, C88.x,<br>C96.x, C90.0, C90.2, C97.x                           | Elixhauser (combining: 'Lymphoma',<br>'Metastatic cancer' and 'Solid tumor<br>without metastasis') | 24,036 | 9.3  | 18             | 13    | 18   | 51   |  |
| <b>Cardiac arrhythmias, including<br/>atrial fibrillation*</b>  | I44.1-I44.3, I45.6, I45.9, I47.x-I49.x, R00.0*, R00.1*,<br>R00.8*, T82.1, Z45.0, Z95.0                                                                                     | Elixhauser Index                                                                                   | 69,883 | 27.1 | 11             | 6     | 24   | 59   |  |
| <b>Cerebrovascular disease, including<br/>stroke/TIA (CVD)*</b> | G45.x*, G46.x, H34.0, I60.x-I69.x*                                                                                                                                         | Charlson Index                                                                                     | 27,497 | 10.7 | 7              | 4     | 16   | 74   |  |
| <b>Chronic IHD</b>                                              | I25.x                                                                                                                                                                      | New                                                                                                | 26,050 | 10.1 | 4              | 1     | 40   | 56   |  |
| <b>Chronic kidney disease*</b>                                  | N00.x–N08.x, N11.x, N12.x, N14.x–N16.x, N18.x*,<br>N19.x*, N25.x–N28.x*, N39.1*, N39.2*, Q60.x–Q63.x,<br>T82.4, T86.1, V56.0, V56.8, V42.0, V45.1, Z49.x, Z94.0,<br>Z99.2* | New –expanded version of renal<br>disease in both Charlson and<br>Elixhauser indices               | 29,169 | 11.3 | 2              | 5     | 13   | 80   |  |

|                                  |                                                                                                       |                                                                                   |        |      |    |    |    |    |
|----------------------------------|-------------------------------------------------------------------------------------------------------|-----------------------------------------------------------------------------------|--------|------|----|----|----|----|
| <b>Chronic pulmonary disease</b> | I27.8, I27.9, J40.x -J44.x, J60.x -J67.x, J68.4, J70.1, J70.3                                         | Elixhauser (excluding J45-J47, now in a new category: 'Asthma or bronchiectasis') | 24,227 | 9.4  | 14 | 6  | 25 | 56 |
| <b>Coagulopathy</b>              | D65.x-D68.x, D69.1, D69.3-D69.6                                                                       | Elixhauser                                                                        | 11,079 | 4.3  | 5  | 4  | 17 | 74 |
| <b>Congestive heart failure</b>  | I09.9, I11.0, I13.0, I13.2, I42.0, I42.5-I42.9, I43.x, I50.x, P29.0                                   | Elixhauser (excluding I25.5, included in the new category CIHD above)             | 37,770 | 14.7 | 4  | 3  | 26 | 68 |
| <b>Dementia*</b>                 | F00.x-F03.x*, F05.1*, G30.X*, G31.1*                                                                  | Charlson                                                                          | 33,319 | 12.9 | 4  | 25 | 5  | 66 |
| <b>Depression*</b>               | F20.4, F31.3-F31.5, F32.x*, F33.x, F34.1, F41.2, F43.2                                                | Elixhauser                                                                        | 7,585  | 2.9  | 6  | 7  | 11 | 77 |
| <b>Diabetes</b>                  | E10.x- E14.x                                                                                          | Elixhauser (combining uncomplicated and complicated diabetes)                     | 32,374 | 12.6 | 8  | 5  | 25 | 63 |
| <b>Drug abuse</b>                | F11.x -F16.x, F18.x, F19.x, Z71.5, Z72.2                                                              | Elixhauser                                                                        | 603    | 0.2  | 2  | 7  | 9  | 81 |
| <b>Epilepsy*</b>                 | G40.x*, G41.x                                                                                         | New                                                                               | 1,523  | 0.6  | 5  | 9  | 9  | 77 |
| <b>Hypertension</b>              | I10.x -I13.x, I15.x                                                                                   | Elixhauser (combining uncomplicated and complicated hypertension)                 | 77,940 | 30.3 | 6  | 4  | 27 | 63 |
| <b>Hypothyroidism</b>            | E00.x -E03.x, E89.0                                                                                   | Elixhauser                                                                        | 3,007  | 1.2  | 3  | 5  | 17 | 75 |
| <b>Liver disease</b>             | B18.x, I85.x, I86.4, I98.2, K70.x, K71.1, K71.3-K71.5, K71.7, K72.x -K74.x, K76.0, K76.2-K76.9, Z94.4 | Elixhauser                                                                        | 2,595  | 1.0  | 5  | 4  | 19 | 71 |
| <b>Multiple sclerosis</b>        | G35.x, G36.x, G367.x, H46.x                                                                           | New                                                                               | 56     | 0.0  | 11 | 9  | 18 | 63 |

|                                                          |                                                                                                                      |                                                                    |        |     |    |    |    |    |
|----------------------------------------------------------|----------------------------------------------------------------------------------------------------------------------|--------------------------------------------------------------------|--------|-----|----|----|----|----|
| <b>Myocardial infarction</b>                             | I21.x, I22.x                                                                                                         | Charlson (excluding I25.2 included in the new category CIHD above) | 19,227 | 7.5 | 3  | 1  | 35 | 61 |
| <b>Parkinson's*</b>                                      | G20.x*, G21.x, G22.x                                                                                                 | New                                                                | 5,203  | 2.0 | 4  | 14 | 7  | 75 |
| <b>Peptic ulcer disease excluding bleeding*</b>          | K25.7, K25.9, K26.7*, K26.9*, K27.7, K27.9, K28.7, K28.9                                                             | Elixhauser Index                                                   | 1,967  | 0.8 | 13 | 8  | 18 | 61 |
| <b>Peripheral vascular disorders</b>                     | I70.x, I71.x, I73.1, I73.8, I73.9, I77.1, I79.0, I79.2, K55.1, K55.8, K55.9, Z95.8, Z95.9                            | Elixhauser Index                                                   | 11,724 | 4.6 | 8  | 4  | 22 | 65 |
| <b>Psychoses</b>                                         | F20.x, F22.x -F25.x, F28.x, F29.x, F30.2, F31.2, F31.5                                                               | Elixhauser Index                                                   | 1,493  | 0.6 | 8  | 7  | 13 | 71 |
| <b>Pulmonary circulation disorders</b>                   | I26.x, I27.x, I28.0, I28.8, I28.9                                                                                    | Elixhauser Index                                                   | 9,290  | 3.6 | 6  | 3  | 25 | 67 |
| <b>Rheumatoid arthritis / collagen vascular diseases</b> | L94.0, L94.1, L94.3, M05.x, M06.x, M08.x, M12.0, M12.3, M30.x, M31.0-M31.3, M32.x -M35.x, M45.x, M46.1, M46.8, M46.9 | Elixhauser Index                                                   | 3,253  | 1.3 | 8  | 10 | 16 | 66 |
| <b>Valvular disease</b>                                  | A52.0, I05.x -I08.x, I09.1, I09.8, I34.x -I39.x, Q23.0-Q23.3, Z95.2-Z95.4                                            | Elixhauser Index                                                   | 11,635 | 4.5 | 3  | 2  | 29 | 67 |
| <b>Paralysis*</b>                                        | G04.1, G11.4, G80.1, G80.2, G81.x*, G82.x, G83.0-G83.4, G83.9                                                        | Elixhauser Index                                                   | 12,086 | 4.7 | 0  | 1  | 3  | 95 |

\* Overlapping ICD-10 codes with HFRS diagnoses



**Supplementary Table S5:** List of ICD-10 codes for HFERS calculation, and prevalence within cohort and by multimorbidity and frailty risk status

| ICD-10 code | Description                                                                                   | Cohort |      | % within group |            |         |      |
|-------------|-----------------------------------------------------------------------------------------------|--------|------|----------------|------------|---------|------|
|             |                                                                                               | N      | %    | Neither        | Frail only | MM only | Both |
| A04         | Other bacterial intestinal infections                                                         | 2348   | 0.9  | 10             | 24         | 3       | 63   |
| A09         | Diarrhoea and gastroenteritis of presumed infectious origin                                   | 17,792 | 6.9  | 16             | 24         | 5       | 54   |
| A41         | Other septicaemia                                                                             | 13,205 | 5.1  | 5              | 22         | 3       | 69   |
| B95         | Streptococcus and staphylococcus as the cause of diseases classified to other chapters        | 17,635 | 6.8  | 6              | 24         | 3       | 68   |
| B96         | Other bacterial agents as the cause of diseases classified to other chapters (secondary code) | 39,039 | 15.2 | 2              | 34         | 1       | 63   |
| D64         | Other anaemias                                                                                | 24,300 | 9.4  | 11             | 20         | 9       | 61   |
| E05         | Thyrotoxicosis [hyperthyroidism]                                                              | 1,331  | 0.5  | 8              | 16         | 13      | 63   |
| E16         | Other disorders of pancreatic internal secretion                                              | 971    | 0.4  | 7              | 19         | 4       | 69   |
| E53         | Deficiency of other B group vitamins                                                          | 2,778  | 1.1  | 4              | 30         | 3       | 63   |
| E55         | Vitamin D deficiency                                                                          | 4,801  | 1.9  | 4              | 29         | 3       | 64   |
| E83         | Disorders of mineral metabolism                                                               | 10,255 | 4.0  | 7              | 19         | 7       | 67   |
| E86         | Volume depletion                                                                              | 39,117 | 15.2 | 8              | 28         | 3       | 62   |
| E87         | Other disorders of fluid, electrolyte and acid- base balance                                  | 40,037 | 15.5 | 6              | 23         | 5       | 67   |
| F00*        | Dementia in Alzheimer's disease                                                               | 6,408  | 2.5  | 0              | 35         | 0       | 65   |
| F01*        | Vascular dementia                                                                             | 2,995  | 1.2  | 3              | 17         | 4       | 76   |
| F03*        | Unspecified dementia                                                                          | 22,837 | 8.9  | 5              | 24         | 5       | 66   |
| F05*        | Delirium, not induced by alcohol and other psychoactive substances                            | 21,983 | 8.5  | 2              | 29         | 1       | 69   |
| F10*        | Mental and behavioural disorders due to use of alcohol                                        | 3,417  | 1.3  | 8              | 12         | 11      | 68   |
| F32*        | Depressive episode                                                                            | 5,986  | 2.3  | 5              | 7          | 9       | 78   |
| G20*        | Parkinson's disease                                                                           | 4,986  | 1.9  | 4              | 14         | 7       | 75   |
| G30*        | Alzheimer's disease                                                                           | 6,460  | 2.5  | 0              | 34         | 0       | 66   |
| G31*        | Other degenerative diseases of nervous system, not elsewhere classified                       | 1,680  | 0.7  | 6              | 19         | 4       | 71   |
| G40*        | Epilepsy                                                                                      | 1,423  | 0.6  | 5              | 9          | 9       | 77   |
| G45*        | Transient cerebral ischaemic attacks and related syndromes                                    | 7,682  | 3.0  | 15             | 6          | 21      | 58   |
| G81*        | Hemiplegia                                                                                    | 11,292 | 4.4  | 0              | 1          | 2       | 97   |
| H54         | Blindness and low vision                                                                      | 3,197  | 1.2  | 6              | 24         | 5       | 66   |
| H91         | Other hearing loss                                                                            | 3,198  | 1.2  | 6              | 25         | 5       | 64   |
| I63*        | Cerebral infarction                                                                           | 8,471  | 3.3  | 2              | 2          | 11      | 84   |
| I67*        | Other cerebrovascular diseases                                                                | 1,643  | 0.6  | 2              | 5          | 6       | 86   |
| I69*        | Sequelae of cerebrovascular disease (secondary codes)                                         | 4,506  | 1.7  | 0              | 2          | 1       | 97   |
| I95         | Hypotension                                                                                   | 38,267 | 14.9 | 8              | 22         | 7       | 63   |
| J18         | Pneumonia, organism unspecified                                                               | 28,718 | 11.2 | 16             | 17         | 11      | 56   |
| J22         | Unspecified acute lower respiratory infection                                                 | 15,497 | 6.0  | 15             | 17         | 11      | 57   |
| J69         | Pneumonitis due to solids and liquids                                                         | 7,831  | 3.0  | 6              | 19         | 3       | 72   |
| J96         | Respiratory failure, not elsewhere classified                                                 | 7,695  | 3.0  | 7              | 12         | 9       | 71   |
| K26*        | Duodenal ulcer                                                                                | 1,520  | 0.6  | 15             | 18         | 8       | 59   |

|      |                                                                                                     |        |      |    |    |    |    |
|------|-----------------------------------------------------------------------------------------------------|--------|------|----|----|----|----|
| K52  | Other noninfective gastroenteritis and colitis                                                      | 4,109  | 1.6  | 15 | 20 | 8  | 57 |
| K59  | Other functional intestinal disorders                                                               | 33,072 | 12.8 | 10 | 28 | 4  | 58 |
| K92  | Other diseases of digestive system                                                                  | 14,405 | 5.6  | 23 | 17 | 10 | 50 |
| L03  | Cellulitis                                                                                          | 19,021 | 7.4  | 15 | 23 | 5  | 57 |
| L08  | Other local infections of skin and subcutaneous tissue                                              | 1,068  | 0.4  | 11 | 22 | 5  | 62 |
| L89  | Decubitus ulcer                                                                                     | 12,691 | 4.9  | 3  | 24 | 2  | 71 |
| L97  | Ulcer of lower limb, not elsewhere classified                                                       | 8,187  | 3.2  | 5  | 23 | 3  | 69 |
| M15  | Polyarthrosis                                                                                       | 597    | 0.2  | 8  | 22 | 6  | 63 |
| M19  | Other arthrosis                                                                                     | 4,154  | 1.6  | 8  | 22 | 7  | 62 |
| M25  | Other joint disorders, not elsewhere classified                                                     | 9,564  | 3.7  | 12 | 29 | 4  | 55 |
| M41  | Scoliosis                                                                                           | 607    | 0.2  | 11 | 30 | 3  | 57 |
| M48  | Spinal stenosis (secondary code only)                                                               | 4,155  | 1.6  | 17 | 27 | 7  | 49 |
| M79  | Other soft tissue disorders, not elsewhere classified                                               | 5,069  | 2.0  | 15 | 22 | 6  | 57 |
| M80  | Osteoporosis with pathological fracture                                                             | 21,568 | 8.4  | 20 | 20 | 12 | 47 |
| M81  | Osteoporosis without pathological fracture                                                          | 15,348 | 6.0  | 12 | 21 | 10 | 56 |
| N17  | Acute renal failure                                                                                 | 28,079 | 10.9 | 3  | 17 | 5  | 76 |
| N18* | Chronic renal failure                                                                               | 24,658 | 9.6  | 1  | 4  | 12 | 83 |
| N19* | Unspecified renal failure                                                                           | 3,191  | 1.2  | 2  | 7  | 11 | 80 |
| N20  | Calculus of kidney and ureter                                                                       | 1,588  | 0.6  | 30 | 19 | 9  | 43 |
| N28* | Other disorders of kidney and ureter, not elsewhere classified                                      | 1,350  | 0.5  | 5  | 8  | 13 | 74 |
| N39* | Other disorders of urinary system (includes urinary tract infection and urinary incontinence)       | 50,226 | 19.5 | 3  | 36 | 1  | 61 |
| R00* | Abnormalities of heart beat                                                                         | 15,834 | 6.1  | 12 | 8  | 18 | 62 |
| R02  | Gangrene, not elsewhere classified                                                                  | 643    | 0.2  | 8  | 20 | 3  | 68 |
| R11  | Nausea and vomiting                                                                                 | 14,826 | 5.8  | 19 | 22 | 8  | 51 |
| R13  | Dysphagia                                                                                           | 15,837 | 6.1  | 7  | 18 | 4  | 70 |
| R26  | Abnormalities of gait and mobility                                                                  | 12,644 | 4.9  | 4  | 28 | 2  | 66 |
| R29  | Other symptoms and signs involving the nervous and musculoskeletal systems (R29-6 Tendency to fall) | 18,269 | 7.1  | 2  | 30 | 1  | 68 |
| R31  | Unspecified haematuria                                                                              | 7,939  | 3.1  | 10 | 25 | 4  | 61 |
| R32  | Unspecified urinary incontinence                                                                    | 19,010 | 7.4  | 3  | 26 | 2  | 69 |
| R33  | Retention of urine                                                                                  | 15,590 | 6.1  | 9  | 26 | 4  | 61 |
| R40  | Somnolence, stupor and coma                                                                         | 3,526  | 1.4  | 4  | 22 | 2  | 72 |
| R41  | Other symptoms and signs involving cognitive functions and awareness                                | 20,367 | 7.9  | 4  | 28 | 2  | 66 |
| R44  | Other symptoms and signs involving general sensations and perceptions                               | 1,727  | 0.7  | 5  | 23 | 3  | 68 |
| R45  | Symptoms and signs involving emotional state                                                        | 3,690  | 1.4  | 3  | 21 | 3  | 73 |
| R47  | Speech disturbances, not elsewhere classified                                                       | 10,193 | 4.0  | 4  | 7  | 7  | 82 |
| R50  | Fever of unknown origin                                                                             | 6,824  | 2.6  | 16 | 20 | 10 | 54 |
| R54  | Senility                                                                                            | 1,373  | 0.5  | 5  | 30 | 3  | 62 |
| R55  | Syncope and collapse                                                                                | 19,639 | 7.6  | 21 | 25 | 8  | 47 |
| R56  | Convulsions, not elsewhere classified                                                               | 2,789  | 1.1  | 9  | 20 | 3  | 69 |
| R63  | Symptoms and signs concerning food and fluid intake                                                 | 6,732  | 2.6  | 12 | 23 | 6  | 60 |
| R69  | Unknown and unspecified causes of morbidity                                                         | 234    | 0.1  | 20 | 22 | 5  | 53 |
| R79  | Other abnormal findings of blood chemistry                                                          | 1,219  | 0.5  | 16 | 19 | 9  | 56 |
| R94  | Abnormal results of function studies                                                                | 6,972  | 2.7  | 9  | 20 | 8  | 63 |
| S00  | Superficial injury of head                                                                          | 10,134 | 3.9  | 5  | 42 | 0  | 53 |
| S01  | Open wound of head                                                                                  | 11,939 | 4.6  | 14 | 36 | 2  | 48 |

|      |                                                                           |        |      |    |    |    |    |
|------|---------------------------------------------------------------------------|--------|------|----|----|----|----|
| S06  | Intracranial injury                                                       | 5,133  | 2.0  | 7  | 39 | 1  | 53 |
| S09  | Other and unspecified injuries of head                                    | 2,606  | 1.0  | 12 | 33 | 2  | 54 |
| S22  | Fracture of rib(s), sternum and thoracic spine                            | 6,206  | 2.4  | 11 | 35 | 2  | 52 |
| S32  | Fracture of lumbar spine and pelvis                                       | 7,682  | 3.0  | 11 | 40 | 2  | 47 |
| S42  | Fracture of shoulder and upper arm                                        | 4,887  | 1.9  | 13 | 41 | 1  | 45 |
| S51  | Open wound of forearm                                                     | 5,935  | 2.3  | 11 | 30 | 2  | 56 |
| S72  | Fracture of femur                                                         | 15,651 | 6.1  | 14 | 37 | 2  | 47 |
| S80  | Superficial injury of lower leg                                           | 3,937  | 1.5  | 8  | 37 | 1  | 54 |
| T83  | Complications of genitourinary prosthetic devices, implants and grafts    | 3,098  | 1.2  | 2  | 27 | 1  | 70 |
| U80  | Agent resistant to penicillin and related antibiotics                     | 0      | 0.0  | 0  | 0  | 0  | 0  |
| W01  | Fall on same level from slipping, tripping and stumbling                  | 25,913 | 10.1 | 23 | 31 | 3  | 43 |
| W06  | Fall involving bed                                                        | 4,648  | 1.8  | 9  | 29 | 2  | 60 |
| W10  | Fall on and from stairs and steps                                         | 4,362  | 1.7  | 27 | 33 | 3  | 37 |
| W18  | Other fall on same level                                                  | 21,710 | 8.4  | 10 | 35 | 2  | 53 |
| W19  | Unspecified fall                                                          | 21,559 | 8.4  | 5  | 38 | 1  | 57 |
| X59  | Exposure to unspecified factor                                            | 5,095  | 2.0  | 12 | 26 | 3  | 58 |
| Y84  | Other medical procedures as the cause of abnormal reaction of the patient | 10,872 | 4.2  | 8  | 18 | 10 | 64 |
| Y95  | Nosocomial condition                                                      | 1,156  | 0.4  | 2  | 18 | 2  | 77 |
| Z22  | Carrier of infectious disease                                             | 3,024  | 1.2  | 5  | 17 | 3  | 75 |
| Z50* | Care involving use of rehabilitation procedures                           | 25,433 | 9.9  | 3  | 23 | 2  | 72 |
| Z60  | Problems related to social environment                                    | 29,613 | 11.5 | 12 | 29 | 6  | 52 |
| Z73  | Problems related to life-management difficulty                            | 789    | 0.3  | 9  | 27 | 4  | 61 |
| Z74  | Problems related to care-provider dependency                              | 23,475 | 9.1  | 6  | 27 | 3  | 65 |
| Z75  | Problems related to medical facilities and other health care              | 17,564 | 6.8  | 6  | 22 | 6  | 66 |
| Z87  | Personal history of other diseases and conditions                         | 4,131  | 1.6  | 29 | 23 | 13 | 36 |
| Z91  | Personal history of risk-factors, not elsewhere classified                | 4,493  | 1.7  | 8  | 14 | 10 | 68 |
| Z93  | Artificial opening status                                                 | 3,634  | 1.4  | 9  | 24 | 4  | 63 |
| Z99* | Dependence on enabling machines and devices                               | 3,198  | 1.2  | 6  | 17 | 7  | 70 |

\* Overlapping ICD-10 codes with multimorbidity list
